# Supplementary material
Source: PubMed Central journal article supplement (PMC3685243)
Supplement: AEM.00243-13_zam999104382so1.pdf [file AEM.00243-13_zam999104382so1.pdf]

## Supplemental Material

Characterization of lipoteichoic acid from *Lactobacillus gasseri* JCM 1131<sup>T</sup>: A novel glycolipid anchor structure

Tsukasa Shiraishi <sup>a</sup>, Shin-ichi Yokota <sup>b</sup>, Naoki Morita <sup>c</sup>, Satoru Fukiya <sup>a</sup>, Satoru Tomita <sup>d\*</sup>, Naoto Tanaka <sup>d</sup>, Sanae Okada <sup>d</sup>, and Atsushi Yokota <sup>a</sup>

<sup>a</sup>, Laboratory of Microbial Physiology, Research Faculty of Agriculture, Hokkaido University, Kita 9 Nishi 9, Kita-ku, Sapporo, Hokkaido 060-8589, Japan.

<sup>b</sup>, Department of Microbiology, Sapporo Medical University School of Medicine, Minami 1 Nishi 17, Chuo-ku, Sapporo, Hokkaido 060-8556, Japan.

<sup>c</sup>, Bioproduction Research Institute, National Institute of Advanced Industrial Science and Technology (AIST), 2-17-2-1 Tsukisamu-higashi, Toyohira-ku, Sapporo, Hokkaido 062-8517, Japan.

<sup>d</sup>, NODAI Culture Collection Center, Faculty of Applied Bio-Science, Tokyo University of Agriculture, 1-1-1 Sakuragaoka, Setagaya-ku, Tokyo 156-8502, Japan.

\*Present address: Satoru Tomita, TI Food & Nutrition, Nieuwe Kanaal 9A, 6709PA, Wageningen, The Netherlands; NIZO food research, Kernhemseweg 2, 6718ZB, Ede, The Netherlands.

21 **Bacterial strain and growth conditions**

22 *Lactobacillus gasseri* JCM 1131<sup>T</sup> was obtained from the Japan Collection of  
23 Microorganisms, RIKEN BioResource Center (Tsukuba, Japan). The cells were cultured at  
24 37°C under anaerobic conditions in 0.5 × Difco Lactobacilli MRS Broth (Becton Dickinson  
25 and Co., Franklin Lakes, NJ), which was supplemented with 200 mM  
26 2-morpholinoethanesulfonic acid and adjusted to pH 6.5 with NaOH. The bacterial cells were  
27 grown to an optical density at 660 nm of 0.6 (log phase).

28

29 **Purification of lipoteichoic acid (LTA)**

30 The bacterial cells were collected by centrifugation (10,000 × g, 8 min, 20°C). The cells  
31 were disrupted by a French pressure cell (Ohtake Works, Tokyo, Japan), and the residues were  
32 removed by centrifugation (10,000 × g, 15 min, 4°C). The supernatant was stirred with an  
33 equal volume of n-butanol for 30 min at room temperature, and then centrifuged (10,000 × g,  
34 10 min, 20°C). The lower aqueous layer was lyophilized, and then dissolved with 15% (v/v)  
35 n-propanol in 100 mM sodium acetate buffer (pH 4.7). After centrifugation (10,000 × g, 10  
36 min, 4°C), the supernatant was applied to an Octyl Sepharose 4 Fast Flow column (GE  
37 Healthcare UK Ltd., Little Chalfont, UK). Bound material was eluted in a stepwise manner  
38 with 15, 25, 35, and 45% (v/v) n-propanol in 100 mM sodium acetate buffer (pH 4.7). LTA  
39 was eluted in 35% (v/v) n-propanol-containing buffer. The combined LTA fractions were  
40 concentrated, dialyzed against water, and lyophilized.

41 **Analysis of the repeating unit structure of LTA by nuclear magnetic resonance (NMR)**  
42 **spectroscopy**

43 The LTA preparation was dissolved in 99.96% D<sub>2</sub>O (Cambridge Isotope Laboratories,  
44 Inc., Andover, MA) and analyzed using <sup>1</sup>H and <sup>13</sup>C distortionless enhancement by polarization  
45 transfer (DEPT)-135 NMR spectroscopy with a Bruker AMX-500 spectrometer at 500 MHz  
46 for <sup>1</sup>H NMR and 126 MHz for <sup>13</sup>C DEPT-135 NMR. Two-dimensional homonuclear  
47 correlation spectroscopy (COSY) (<sup>1</sup>H-<sup>1</sup>H) and two-dimensional heteronuclear multiple  
48 quantum coherence (HMQC) and heteronuclear multiple bond connectivity (HMBC) (<sup>1</sup>H-<sup>13</sup>C)  
49 were carried out. The chemical shifts were given with 3-(trimethylsilyl)propionic-2, 2, 3, 3-D<sub>4</sub>  
50 acid as an external standard ( $\delta_{\text{H}}$  and  $\delta_{\text{C}}$  0.00).

51

52 **Preparation of the glycolipid anchor and carbohydrate portion of the glycolipid anchor**

53 The glycolipid anchor fraction of LTA was prepared by treatment with 98% (v/v) acetic  
54 acid at 100°C for 3 h. After the removal of acetic acid, the product was partitioned with  
55 chloroform/water (1:1, v/v). The organic layer was used as the glycolipid anchor fraction. The  
56 carbohydrate portion of the glycolipid anchor was obtained via deacylation by treatment with  
57 20% (w/v) ammonia at room temperature for 12 h. After the removal of ammonia, the product  
58 was partitioned with chloroform/methanol/water (2:1:3, v/v/v). The aqueous layer was  
59 recovered.

60

61 **The glycolipid anchor structure of LTA as determined by matrix-assisted laser**  
62 **desorption/ionization time-of-flight mass spectrometry (MALDI-TOF MS)**

63 The glycolipid anchor fraction dissolved in chloroform/methanol (2:1, v/v) at a  
64 concentration of 1  $\mu\text{g}/\mu\text{l}$  was mixed with an equal amount of matrix [10 mg/ml of  
65 2,5-dihydroxybenzoic acid (DHBA) in water/methanol (7:3, v/v) containing 0.1% (w/v)  
66 trifluoroacetic acid (TFA)] on a plate of MTP 384 target ground steel TF (Bruker Daltonics  
67 Inc., Billerica, MA). The carbohydrate fraction (0.1  $\mu\text{g}/\mu\text{l}$  in water) was mixed with an equal  
68 amount of matrix [saturated DHBA dissolved in 50% (v/v) acetonitrile] on the plate. After  
69 co-crystallization, MALDI-TOF mass spectra were acquired in the positive ion and reflectron  
70 modes, and the molecular mass was determined using Autoflex II TOF/TOF with the  
71 flexControl software (Bruker Daltonics Inc.).

72

73 **Chemical composition of the glycolipid anchor by gas chromatography (GC)**

74 The carbohydrate portion of the glycolipid prepared above was dissolved in 50 mM  
75 ammonium bicarbonate buffer, and further purified by gel-filtration chromatography on a  
76 Superdex Peptide HR 10/30 column (GE Healthcare UK Ltd.). Elution of the carbohydrate  
77 was monitored by the phenol-sulfuric acid method (1), and the major sugar fractions were  
78 pooled and lyophilized. The oligosaccharide was hydrolyzed with 1 M HCl at 100°C for 3 h.  
79 After the removal of HCl, mannitol was added as an internal standard. The hydrolysate was  
80 peracetylated with pyridine and acetic anhydride for 20 h at room temperature. The products

81 were analyzed by GC using GC-1700 (Shimadzu Corp., Kyoto, Japan) with 50 m × 0.22 mm  
82 (internal diameter) of a BPX70 capillary column (SGE Analytical Science Pty. Ltd.,  
83 Ringwood, Australia) at 170°C for 6 min, 170-260°C (20°C/min), and maintained at 260°C  
84 for 25 min.

85 Fatty acid composition was determined as described previously (2). The LTA preparation  
86 was hydrolyzed with 1 M NaOH for 3 h at 100°C, and then neutralized with HCl. The  
87 resulting material was extracted with chloroform. After the addition of heneicosanoic acid as  
88 an internal standard, the materials were treated with 10% (v/v) acetyl chloride in methanol for  
89 3 h at 100°C, and then extracted with n-hexane. The methyl esters of the fatty acids were  
90 analyzed by GC using a GC-1700 with 25 m × 0.22 mm (internal diameter) of a BPX70  
91 capillary column (SGE Analytical Science Pty. Ltd.) at 160-260°C (10°C/min), and  
92 maintained at 260°C for 8 min. The peaks of the fatty acids were identified using FAME  
93 Quantitative & Qualitative Mixtures (No. 1021-58110; GL Sciences, Inc., Tokyo, Japan) as  
94 standards.

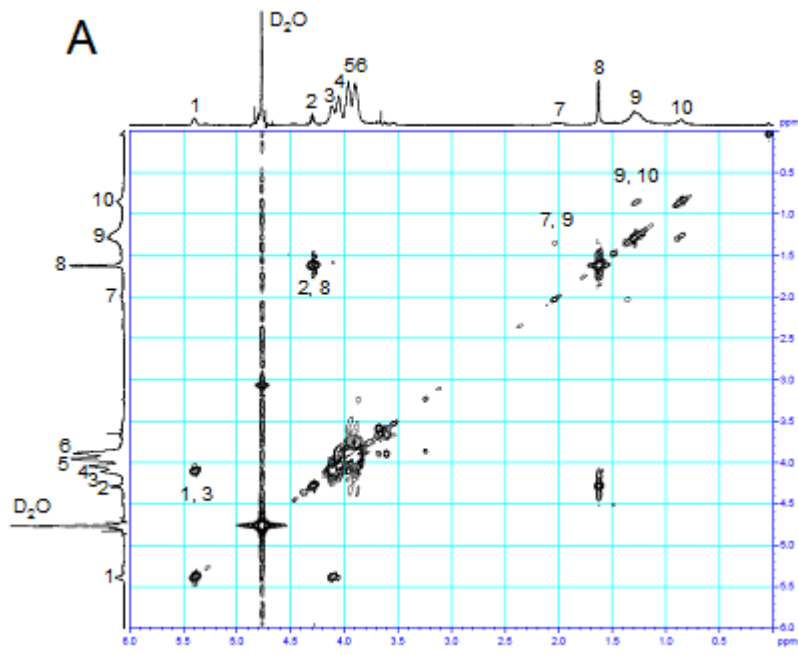

95

96

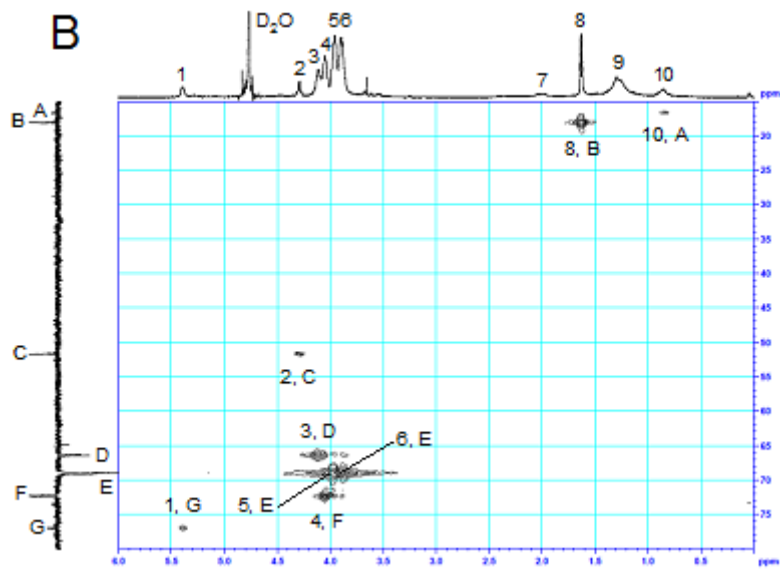

97

98

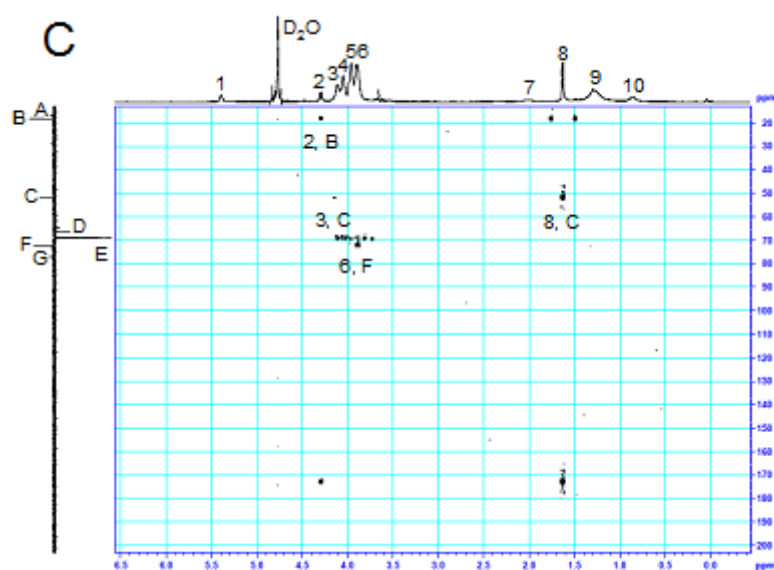

99

100 **FIG S1** NMR spectra for purified *L. gasseri* JCM 1131<sup>T</sup> LTA. Two-dimensional COSY (A),  
 101 HMQC (B) and HMBC (C) spectra are shown. 1, AlaGro H-2; 2, Ala H-2; 3, AlaGro H-1 and  
 102 -3; 4, Gro H-2; 5, Gro H-1 or -3; 6, Gro H-3 or -1; 7, protons linked to carbons next to a  
 103 double-bonded carbon in an unsaturated fatty acid; 8, Ala H-3; 9, protons of CH<sub>2</sub> in fatty  
 104 acids; 10, protons of CH<sub>3</sub> in fatty acids; A, carbons of CH<sub>3</sub> in fatty acids; B, Ala C-3; C, Ala  
 105 C-2; D, AlaGro C-1 or -3; E, Gro C-1 or -3; F, Gro C-2; and G, AlaGro C-2.

106

## 107 **References**

- 108 1. **Lin FM, Pomeranz Y.** 1968. Effect of borate on colorimetric determinations of  
 109 carbohydrates by the phenol-sulfuric acid method. *Anal. Biochem.* **24**:128-131.
- 110 2. **Morita N, Nishida T, Tanaka M, Yano Y, Okuyama H.** 2005. Enhancement of  
 111 polyunsaturated fatty acid production by cerulenin treatment in polyunsaturated fatty  
 112 acid-producing bacteria. *Biotechnol. Lett.* **27**:389-393.
